# Supplementary material
Source: PubMed Central journal article supplement (PMC10270325)
Supplement: NIHMS1885619-supplement-Supplementary_Table_2__Methods_for_Organoid_Engineering_.pdf [file NIHMS1885619-supplement-Supplementary_Table_2__Methods_for_Organoid_Engineering_.pdf]

**Supplementary Table 2. Methods for Organoid Engineering.**

| <b>Method</b>         | <b>Timeline of Organoids</b>                                                          | <b>Advantages</b>                                                                | <b>Disadvantages</b>                                                       | <b>Applications</b>                                                                                                    | <b>Ref.</b> |
|-----------------------|---------------------------------------------------------------------------------------|----------------------------------------------------------------------------------|----------------------------------------------------------------------------|------------------------------------------------------------------------------------------------------------------------|-------------|
| Bioprinting           | Intestinal organoids (2021)                                                           | Controlled cell-matrix structures; Precise 3D biological geometries              | Resolution of printed material; Density of the tissue; Organ functionality | Functional organ formation; Large-scale manufacture of artificial organs for transplantation and regenerative medicine | 1,2         |
| Droplet microfluidics | Cholangiocyte organoids (2021), Inter-organoid platform (2020), Lung organoids (2021) | Powerful platform for manipulating organoids; Establishment of complex organoids | Lacking control over the cell-to-cell ratios in the structures             | Assessing intra-organoid heterogeneity; Fabricating homogenous organoids                                               | 3,4         |
| Microwells            | Intestinal organoids (2014), Kidney organoids (2018), Liver organoids (2018)          | Controlled cell aggregation and growth patterns                                  | Small scale                                                                | Live-cell manipulations; Direct quantitative analysis of organoids                                                     | 5-7         |
| Gel embedment         | Intestinal organoids (2016-2017, 2021-2022);                                          | Recapitulates the ECM components of tissue                                       | Non-defined composition, lack of control over spatiotemporal cues          | Increasing variability, decoupling stiffness, and enhancing the functionality of organoids                             | 8-16        |
| Surface tethering     | Various organoids                                                                     | Provides ECM support and signaling cues                                          |                                                                            | Producing biomimetic scaffolds for organoid culture; Dissecting the                                                    | 17,18       |

|                                       |                                                                                                        |                                                                    |                               |                                                                                                                                  |         |
|---------------------------------------|--------------------------------------------------------------------------------------------------------|--------------------------------------------------------------------|-------------------------------|----------------------------------------------------------------------------------------------------------------------------------|---------|
| Scaffold anchoring                    | Intestinal organoids (2020)                                                                            | Offers flexibility with specificity; Provide geometrical cues      |                               | stem cell niche<br><br>Optimizing the combination of signals for modulating ASCs; Scale-up of organoids in a well-defined manner | 19,20   |
| Micro-fabricated cages/organ-on-chips | Liver organoids (2014), Pancreatic organoids (2019), Stomach organoids (2018), Kidney organoids (2019) | Can imitate key physiological and structural features of the organ | Absent of vascular structures | Drug screening; Disease modeling; Investigating cell-cell, cell-organ, and organ-organ interactions                              | 7,21-28 |
